Review Article

# Physical Activity and Colorectal Cancer Risk: An Evaluation Based on a Systematic Review of Epidemiologic Evidence Among the Japanese Population

Ngoc Minh Pham<sup>1</sup>, Tetsuya Mizoue<sup>1,\*</sup>, Keitaro Tanaka<sup>2</sup>, Ichiro Tsuji<sup>3</sup>, Akiko Tamakoshi<sup>4</sup>, Keitaro Matsuo<sup>5</sup>, Hidemi Ito<sup>5</sup>, Kenji Wakai<sup>6</sup>, Chisato Nagata<sup>7</sup>, Shizuka Sasazuki<sup>8</sup>, Manami Inoue<sup>8</sup> and Shoichiro Tsugane<sup>8</sup> for the Research Group for the Development and Evaluation of Cancer Prevention Strategies in Japan

<sup>1</sup>Department of Epidemiology and Prevention, International Clinical Research Center, National Center for Global Health and Medicine, Tokyo, <sup>2</sup>Department of Preventive Medicine, Faculty of Medicine, Saga University, Saga, <sup>3</sup>Division of Epidemiology, Department of Public Health and Forensic Medicine, Tohoku University Graduate School of Medicine, Sendai, <sup>4</sup>Department of Public Health, Aichi Medical University School of Medicine, Nagakute, <sup>5</sup>Division of Epidemiology and Prevention, Aichi Cancer Center Research Institute, <sup>6</sup>Department of Preventive Medicine, Nagoya University Graduate School of Medicine, Nagoya, <sup>7</sup>Department of Epidemiology and Preventive Medicine, Gifu University Graduate School of Medicine, Gifu and <sup>8</sup>Epidemiology and Prevention Division, Research Center for Cancer Prevention and Screening, National Cancer Center, Tokyo, Japan

\*For reprints and all correspondence: Tetsuya Mizoue, Department of Epidemiology and Prevention, International Clinical Research Center, National Center for Global Health and Medicine, Tokyo 162-8655, Japan.  
E-mail: mizoue@ri.ncgm.go.jp

Received August 31, 2011; accepted October 11, 2011

**Objective:** Higher levels of physical activity have been consistently associated with a decreased risk of colon cancer, but not rectal cancer, in Western populations. The present study systematically evaluated epidemiologic evidence on the association between physical activity and colorectal cancer risk among the Japanese population.

**Methods:** Original data were obtained from MEDLINE searched using PubMed or from searches of the *Ichushi* database, complemented by manual searches. The associations were evaluated based on the strength of evidence, the magnitude of association and biologic plausibility.

**Results:** Two cohort studies and six case–control studies were identified. A weak to strong protective association between physical activity and colon cancer risk was observed in both cohort studies, showing a graded relationship, and among the majority of case–control studies, with some showing a dose–response relationship. The association observed in cohort studies was more consistent and stronger in men than in women and for proximal colon cancer than for distal colon cancer. A protective association with rectal cancer was found only in case–control studies, but the evidence was less consistent and weaker than that observed for colon cancer.

**Conclusions:** Physical activity probably decreases the risk of colorectal cancer among the Japanese population. More specifically, the evidence for the colon is probable, whereas that for the rectum is insufficient.

*Key words:* systematic review – epidemiology – physical activity – colorectal cancer – Japanese

## INTRODUCTION

Colorectal cancer is a common form of malignancy in developed countries, being the second and third leading cause of

cancer death in men and women, respectively (1). In Japan, colorectal cancer mortality has risen remarkably over the past three decades (1970–2000) (2) and its incidence is

among the highest levels worldwide (3). The increasing trend has been attributed to the changes in lifestyles, especially diet featured by a high intake of animal fats and meat and a low intake of fibers and cereals (4,5). Less attention has been paid to decreased physical activity in modern life as a causal factor that could account for the increased colorectal cancer among Japanese.

Physical activity in relation to colorectal cancer has been extensively investigated (6–10). On the basis of a comprehensive review of epidemiologic studies, the World Cancer Research Fund and American Institute for Cancer Research (WCRF/AIR) (7) concluded that physical activity convincingly reduces colorectal cancer risk; more specifically, the evidence is stronger for the colon than for the rectum. An earlier systematic review and meta-analysis (6) reported a consistent association between physical activity and a decreased risk of colon cancer; however, no association with rectal cancer was observed. Likewise, several recent systematic reviews and meta-analyses (8–10) consistently reported an inverse association of physical activity with colon cancer risk, but not with rectal cancer (8,9). Briefly, there is ample evidence that physical activity is convincingly associated with a reduced risk of colon cancer, but weaker or absent for rectal cancer. However, such evidence has been mainly derived from studies in Western countries and less is known in Asian countries, including Japan.

To assess the strength and consistency of the association between physical activity and colorectal cancer risk among the Japanese population, we conducted a systematic review of epidemiologic studies on this issue in Japan. This is one in a series of articles that summarized epidemiologic evidence on the relationship of lifestyles to total cancers and major forms of cancer in Japan (11,12).

## PATIENTS AND METHODS

This review was based on a MEDLINE search of all published epidemiological studies on the association between physical activity and colorectal cancer incidence or mortality among Japanese published through May 2011. A search of the *Ichushi* (*Japana Centra Revuo Medicina*) database was also done to identify the studies written in Japanese. These methods of literature identification were complemented by manual searches of references from relevant articles where necessary. We employed the terms ‘physical activity’, ‘sports’, ‘colorectal cancer’, ‘colon cancer’, ‘rectal cancer’, ‘case–control studies’, ‘cohort studies’, ‘Japan’ and ‘Japanese’. Articles written in either English or Japanese were reviewed. Only studies on Japanese populations living in Japan were included. Individual results were summarized in tables separately according to study design as cohort or case–control studies.

The studies were evaluated on the basis of the magnitude of association and the strength of evidence. First, relative risks or odds ratios in each epidemiologic study were grouped by the magnitude of association, considering statistical significance (SS) or no statistical significance (NS), into: strong

(symbol  $\uparrow\uparrow\uparrow$  or  $\downarrow\downarrow\downarrow$ ),  $<0.5$  or  $>2.0$  (SS); moderate (symbol  $\uparrow\uparrow$  or  $\downarrow\downarrow$ ), either (a)  $<0.5$  or  $>2.0$  (NS), (b)  $>1.5$ – $2.0$  (SS) or (c)  $0.5$  to  $<0.67$  (SS); weak (symbol  $\uparrow$  or  $\downarrow$ ), either (a)  $>1.5$ – $2.0$  (NS), (b)  $0.5$  to  $<0.67$  (NS) or (c)  $0.67$ – $1.5$  (SS) or no association (symbol  $-$ ),  $0.67$ – $1.5$  (NS). We thus defined, for individual study, the magnitude of association by its strength, i.e. the size of relative risks or odds ratios for the highest physical activity group compared with the lowest, and its SS. Two-sided  $P$  values  $<0.05$  were considered statistically significant. In case of multiple publications of analyses of the same or overlapping datasets, only data from the largest or most recent results were included and the incidence was preferable as the measure of outcome to mortality. After this process, the strength of evidence was evaluated in a similar manner to that used in the WHO/FAO Expert Consultation Report (13), where evidence was classified as ‘convincing’, ‘probable’, ‘possible’ and ‘insufficient’. We assumed that biological plausibility based on evidence in experimental models, human studies and other relevant data. Despite the use of this quantitative assessment rule, an arbitrary assessment cannot be avoided when considerable variation exists in the magnitude of association between the results of each study. The final judgment was made based on a consensus of the research group members, and it was therefore not necessarily objective.

## MAIN FEATURES AND COMMENTS

A total of two cohort studies (14,15) and six case–control studies (16–21) were identified (Tables 1 and 2, respectively). Both cohort studies presented results separately for men and women. Among the case–control studies, two studies presented results by sex (19,21), one for men only (16) and the remaining three studies for men and women combined (17,18,20). The magnitude of association of physical activity with colorectal cancer is summarized in Tables 3 and 4 for cohort studies and case–control studies, respectively.

The two identified cohort studies showed relative risk for each the colon and the rectum. In men, the Japan Public Health Center-based Prospective study (JPHC) (14) found a strong inverse association of physical activity with proximal colon cancer and the other, the Miyagi cohort study (15), reported a strong inverse association with colon cancer. In women, however, physical activity was only weakly related to decreased risk of proximal colon cancer in the JPHC study or was not associated with colon cancer risk in the Miyagi cohort study. For rectal cancer, a moderate positive association was observed in women in the JPHC study, whereas no association was found in women of the Miyagi cohort study or in men of each study. When colon and rectal cancer combined, a weak (14) or moderate (15) inverse association was observed in men, while no association existed in women.

Of the six case–control studies evaluated, five (16–19,21) measured odds ratios for the colon and rectum separately, and one study (20) showed values for the combined colon and rectum only. Of these, two (16,17) found a moderate protective

**Table 1.** Physical activity and colorectal cancer risk, cohort study among Japanese populations

| Reference       | Study period | Study population                  |                                                                                           |                |                                 | Category                       | No. among cases or deaths | Relative risk (95% CI or <i>P</i> ) | <i>P</i> for trend | Confounding variables considered                                                                                                             |
|-----------------|--------------|-----------------------------------|-------------------------------------------------------------------------------------------|----------------|---------------------------------|--------------------------------|---------------------------|-------------------------------------|--------------------|----------------------------------------------------------------------------------------------------------------------------------------------|
|                 |              | No. of subjects for analysis      | Source of subjects                                                                        | Event followed | No. of incident cases or deaths |                                |                           |                                     |                    |                                                                                                                                              |
| Lee et al. (14) | 1995–02      | 65 022 (29 842 men, 35 180 women) | JPHC study (Cohort I: five prefectures, Cohort II: six prefectures), residential registry | Incidence      | Colorectum                      | MET hours per day <sup>a</sup> |                           |                                     |                    | Age, study area, family history of colorectal cancer, smoking, alcohol intake, body mass index, intake of red meat, dietary fiber and folate |
|                 |              |                                   |                                                                                           |                |                                 |                                |                           |                                     |                    |                                                                                                                                              |
|                 |              |                                   |                                                                                           |                | 290 men                         | Lowest                         | 84                        | 1.00                                |                    |                                                                                                                                              |
|                 |              |                                   |                                                                                           |                |                                 | Second                         | 81                        | 0.99 (0.72–1.35)                    |                    |                                                                                                                                              |
|                 |              |                                   |                                                                                           |                |                                 | Third                          | 64                        | 0.85 (0.61–1.20)                    |                    |                                                                                                                                              |
|                 |              |                                   |                                                                                           |                |                                 | Highest                        | 61                        | 0.69 (0.49–0.97)                    | 0.02               |                                                                                                                                              |
|                 |              |                                   |                                                                                           |                | 196 women                       | Lowest                         | 53                        | 1.00                                |                    |                                                                                                                                              |
|                 |              |                                   |                                                                                           |                |                                 | Second                         | 53                        | 1.17 (0.79–1.75)                    |                    |                                                                                                                                              |
|                 |              |                                   |                                                                                           |                |                                 | Third                          | 45                        | 0.97 (0.63–1.47)                    |                    |                                                                                                                                              |
|                 |              |                                   |                                                                                           |                |                                 | Highest                        | 45                        | 1.16 (0.76–1.77)                    | 0.57               |                                                                                                                                              |
|                 |              |                                   |                                                                                           |                | Colon                           |                                |                           |                                     |                    |                                                                                                                                              |
|                 |              |                                   |                                                                                           |                |                                 |                                |                           |                                     |                    |                                                                                                                                              |
|                 |              |                                   |                                                                                           |                | 197 men                         | Lowest                         | 64                        | 1.00                                |                    |                                                                                                                                              |
|                 |              |                                   |                                                                                           |                |                                 | Second                         | 55                        | 0.87 (0.61–1.26)                    |                    |                                                                                                                                              |
|                 |              |                                   |                                                                                           |                |                                 | Third                          | 38                        | 0.62 (0.41–0.95)                    |                    |                                                                                                                                              |
|                 |              |                                   |                                                                                           |                |                                 | Highest                        | 40                        | 0.58 (0.39–0.87)                    | 0.006              |                                                                                                                                              |
|                 |              |                                   |                                                                                           |                | 140 women                       | Lowest                         | 41                        | 1.00                                |                    |                                                                                                                                              |
|                 |              |                                   |                                                                                           |                |                                 | Second                         | 37                        | 1.03 (0.65–1.64)                    |                    |                                                                                                                                              |
|                 |              |                                   |                                                                                           |                |                                 | Third                          | 35                        | 0.91 (0.57–1.47)                    |                    |                                                                                                                                              |
|                 |              |                                   |                                                                                           |                |                                 | Highest                        | 27                        | 0.89 (0.24–1.26)                    | 0.61               |                                                                                                                                              |
|                 |              |                                   |                                                                                           |                | Proximal colon                  |                                |                           |                                     |                    |                                                                                                                                              |
|                 |              |                                   |                                                                                           |                |                                 |                                |                           |                                     |                    |                                                                                                                                              |
|                 |              |                                   |                                                                                           |                | 82 men                          | Lowest                         | 29                        | 1.00                                |                    |                                                                                                                                              |
|                 |              |                                   |                                                                                           |                |                                 | Second                         | 27                        | 0.89 (0.52–1.51)                    |                    |                                                                                                                                              |
|                 |              |                                   |                                                                                           |                |                                 | Third                          | 15                        | 0.44 (0.22–0.86)                    |                    |                                                                                                                                              |
|                 |              |                                   |                                                                                           |                |                                 | Highest                        | 11                        | 0.29 (0.14–0.60)                    | <0.001             |                                                                                                                                              |
|                 |              |                                   |                                                                                           |                | 72 women                        | Lowest                         | 21                        | 1.00                                |                    |                                                                                                                                              |
|                 |              |                                   |                                                                                           |                |                                 | Second                         | 21                        | 1.14 (0.61–2.12)                    |                    |                                                                                                                                              |
|                 |              |                                   |                                                                                           |                |                                 | Third                          | 21                        | 1.01 (0.53–1.89)                    |                    |                                                                                                                                              |
|                 |              |                                   |                                                                                           |                |                                 | Highest                        | 9                         | 0.55 (0.24–1.26)                    | 0.15               |                                                                                                                                              |
|                 |              |                                   |                                                                                           |                | Distal colon                    |                                |                           |                                     |                    |                                                                                                                                              |
|                 |              |                                   |                                                                                           |                |                                 |                                |                           |                                     |                    |                                                                                                                                              |
|                 |              |                                   |                                                                                           |                |                                 |                                |                           |                                     |                    |                                                                                                                                              |
|                 |              |                                   |                                                                                           |                |                                 |                                |                           |                                     |                    |                                                                                                                                              |

*Continued*

Table 1. Continued

| Reference | Study period | Study population             |                    | Category                        | No. among cases or deaths | Relative risk (95% CI or <i>P</i> ) | <i>P</i> for trend | Confounding variables considered |
|-----------|--------------|------------------------------|--------------------|---------------------------------|---------------------------|-------------------------------------|--------------------|----------------------------------|
|           |              | No. of subjects for analysis | Source of subjects |                                 |                           |                                     |                    |                                  |
|           |              |                              | Event followed     | No. of incident cases or deaths |                           |                                     |                    |                                  |
|           |              |                              |                    | 65 men                          | <0.5                      | 1.00                                |                    |                                  |
|           |              |                              |                    |                                 | 0.5–1                     | 1.75 (0.88–3.50)                    |                    |                                  |
|           |              |                              |                    |                                 | >1                        | 1.07 (0.55–2.06)                    | 0.94               |                                  |
|           |              |                              |                    | 44 women                        | <0.5                      | 1.00                                |                    |                                  |
|           |              |                              |                    |                                 | 0.5–1                     | 1.18 (0.54–2.58)                    |                    |                                  |
|           |              |                              |                    |                                 | >1                        | 0.82 (0.39–1.71)                    | 0.55               |                                  |

<sup>a</sup>Estimated from four levels of physical activity: heavy physical work or strenuous exercise, walking and standing, sedentary and sleep or others.<sup>b</sup>Estimated from time spent on walking.

association of physical activity against colon cancer, one (19) showed a weak protective association with proximal colon cancer and another (21) exhibited a moderate to strong protective association with distal colon cancer. A protective association was also observed for rectal cancer, although the association was generally less evident than for colon cancer (16–18,21). The remaining study examining the combined colon and rectal cancer only showed no association (20).

We should discuss several methodological issues regarding the evidence of the relationship between physical activity and colorectal cancer in general and in particular for Japanese studies. First, we did not conduct a meta-analysis to calculate summary effect size of the association between physical activity and risk of colorectal cancer. This is because we found a large discrepancy among the studies reviewed here regarding methods used in the ascertainment of physical activity and categories created to group study participants. Secondly, attention should be focused when interpreting the findings of case-control studies. Case-control studies are prone to recall bias, leading to a difference in reported levels of physical activity between cases and controls. Specifically, a protective association between physical activity and colorectal cancer is overestimated if patients with colorectal cancer tend to underreport physical activity in the past, due to the influence of their disease status on recall, compared with healthy control individuals. Thirdly, most of the case-control studies reviewed in the present paper selected controls from among patients or participants of health checkups or screening, which might have resulted in various extents of selection bias among studies. Fourthly, few case-control studies have controlled for factors including intakes of dietary fiber, folate and vegetables, which have been favorably associated with colorectal cancer risk (22,23). Failure to account for these factors may result in a spurious association between physical activity and the risk of colorectal cancer. However, both cohort studies in the present review showed a strong, inverse association between physical activity and colon cancer in men even after adjustment of potentially important risk or protective factors of colorectal cancer. Fifthly, cohort studies possess their constitutional drawbacks. For one, physical activity level assessed in a prospective cohort design would be non-differentially misclassified, leading to a dilution of association. Furthermore, only baseline measurement of physical activity was used as an exposure variable in the two Japanese cohort studies, but physical activity level may change over the life course. Finally, as with any review based on published articles, we cannot rule out a possibility of publication bias, which would work to produce spurious association even in the case of no association. However, the effect of such bias may not largely distort our conclusion because most case-control studies in this review reported results not only for physical activity but also for other lifestyle factors within the same paper or in other independent ones.

A protective association between physical activity and colorectal cancer is supported by a number of biologic mechanisms. Main hypothesized mechanisms include

**Table 2.** Physical activity and colorectal cancer risk, case–control study among Japanese populations

| Reference        | Study period | Study subjects                                |                                                                                                                                                                                   |                    |                       | Category              | Odds ratio (95% CI or <i>P</i> ) | <i>P</i> for trend | Confounding variables considered                       | Comments                                                                                        |
|------------------|--------------|-----------------------------------------------|-----------------------------------------------------------------------------------------------------------------------------------------------------------------------------------|--------------------|-----------------------|-----------------------|----------------------------------|--------------------|--------------------------------------------------------|-------------------------------------------------------------------------------------------------|
|                  |              | Type and source                               | Definition                                                                                                                                                                        | No. of cases       | No. of controls       |                       |                                  |                    |                                                        |                                                                                                 |
| Kato et al. (16) | 1979–87      | Registry based (Aichi Cancer Registry)        | Cases: histologically confirmed (90%); controls: patients with other sites of cancer excluding known alcohol-related cancers (mouth, pharynx, esophagus, liver and unknown sites) | Colon              |                       | Occupational activity |                                  |                    | Adjusted for age                                       | Each occupation was classified according to the proportion of physically active time on the job |
|                  |              |                                               |                                                                                                                                                                                   | 1716 men           | 16 600 men            | High                  | 1.00                             |                    |                                                        |                                                                                                 |
|                  |              |                                               |                                                                                                                                                                                   |                    |                       | Moderate              | 1.79 (1.50–2.15)                 |                    |                                                        |                                                                                                 |
|                  |              |                                               |                                                                                                                                                                                   |                    |                       | Low                   | 1.87 (1.58–2.23)                 | NA                 |                                                        |                                                                                                 |
|                  |              |                                               |                                                                                                                                                                                   | Proximal colon     |                       |                       |                                  |                    |                                                        |                                                                                                 |
|                  |              |                                               |                                                                                                                                                                                   | 445 men            | 16 600 men            | High                  | 1.00                             |                    |                                                        |                                                                                                 |
|                  |              |                                               |                                                                                                                                                                                   |                    |                       | Moderate              | 1.76 (1.24–2.48)                 |                    |                                                        |                                                                                                 |
|                  |              |                                               |                                                                                                                                                                                   |                    |                       | Low                   | 1.92 (1.38–2.67)                 | NA                 |                                                        |                                                                                                 |
|                  |              |                                               |                                                                                                                                                                                   | Distal colon       |                       |                       |                                  |                    |                                                        |                                                                                                 |
|                  |              |                                               |                                                                                                                                                                                   | 756 men            | 16 600 men            | High                  | 1.00                             |                    |                                                        |                                                                                                 |
|                  |              |                                               |                                                                                                                                                                                   |                    |                       | Moderate              | 1.70 (1.33–2.19)                 |                    |                                                        |                                                                                                 |
|                  |              |                                               |                                                                                                                                                                                   |                    |                       | Low                   | 1.52 (1.19–1.94)                 | NA                 |                                                        |                                                                                                 |
| Kato et al. (17) | 1986–90      | Hospital based (Aichi Cancer Center Hospital) | Cases: histologically confirmed cases among examinees of colonoscopy at the hospital; controls: population controls selected through the telephone directories                    | Colon              |                       | Sports activity       |                                  |                    | Adjusted for residence, sex and age (5-year age group) | *Common controls for cases of cancer of the colon and rectum                                    |
|                  |              |                                               |                                                                                                                                                                                   | 132 (M: 79, F: 53) | 578 (M: 377, F: 201)* | Almost no activity    | 1.00                             |                    |                                                        |                                                                                                 |
|                  |              |                                               |                                                                                                                                                                                   |                    |                       | < 1/week              | 0.72 (0.44–1.19)                 |                    |                                                        |                                                                                                 |
|                  |              |                                               |                                                                                                                                                                                   |                    |                       | ≥ 1/week              | 0.55 (0.33–0.89)                 |                    |                                                        |                                                                                                 |
|                  |              |                                               |                                                                                                                                                                                   |                    |                       | Occupational activity |                                  |                    |                                                        |                                                                                                 |
|                  |              |                                               |                                                                                                                                                                                   |                    |                       | Sedentary             | 1.00                             |                    |                                                        |                                                                                                 |
|                  |              |                                               |                                                                                                                                                                                   |                    |                       | Moderate              | 0.58 (0.37–0.90)                 |                    |                                                        |                                                                                                 |
|                  |              |                                               |                                                                                                                                                                                   |                    |                       | High                  | 0.51 (0.30–0.87)                 |                    |                                                        |                                                                                                 |
|                  |              |                                               |                                                                                                                                                                                   | Rectum             |                       | Sports activity       |                                  |                    |                                                        |                                                                                                 |
|                  |              |                                               |                                                                                                                                                                                   |                    |                       |                       |                                  |                    |                                                        |                                                                                                 |
|                  |              |                                               |                                                                                                                                                                                   |                    |                       |                       |                                  |                    |                                                        |                                                                                                 |

Continued

Table 2. Continued

| Reference          | Study period | Study subjects                                |                                                                                                                      |                |                                                | Category                       | Odds ratio (95% CI or <i>P</i> ) | <i>P</i> for trend | Confounding variables considered        | Comments                                                     |
|--------------------|--------------|-----------------------------------------------|----------------------------------------------------------------------------------------------------------------------|----------------|------------------------------------------------|--------------------------------|----------------------------------|--------------------|-----------------------------------------|--------------------------------------------------------------|
|                    |              | Type and source                               | Definition                                                                                                           | No. of cases   | No. of controls                                |                                |                                  |                    |                                         |                                                              |
| Kotake et al. (18) | 1992–94      | Hospital based (10 hospitals in Kanto region) | Cases: histologically confirmed cases; controls: screening controls and hospital controls, including cancer patients | Colon          | 91 (M: 60, F: 31)<br><br>578 (M: 377, F: 201)* | Almost no activity             | 1.00                             |                    | Matched for sex, age (5-year age group) | Risk estimates for intermediate categories are not shown.    |
|                    |              |                                               |                                                                                                                      |                |                                                | <1/week                        | 0.86 (0.50–1.50)                 |                    |                                         |                                                              |
|                    |              |                                               |                                                                                                                      |                |                                                | ≥1/week                        | 0.54 (0.30–0.97)                 |                    |                                         |                                                              |
|                    |              |                                               |                                                                                                                      |                |                                                | Occupational activity          |                                  |                    |                                         |                                                              |
|                    |              |                                               |                                                                                                                      |                |                                                | Sedentary                      | 1.00                             |                    |                                         |                                                              |
|                    |              |                                               |                                                                                                                      |                |                                                | Moderate                       | 1.24 (0.72–2.15)                 |                    |                                         |                                                              |
|                    |              |                                               |                                                                                                                      |                |                                                | High                           | 0.70 (0.36–1.38)                 |                    |                                         |                                                              |
|                    |              |                                               |                                                                                                                      |                |                                                | Occupational physical activity |                                  |                    |                                         |                                                              |
|                    |              |                                               |                                                                                                                      |                |                                                | Very active                    | 1.0                              |                    |                                         |                                                              |
|                    |              |                                               |                                                                                                                      |                |                                                | Sedentary                      | 1.1 (0.30–2.84)                  |                    |                                         |                                                              |
|                    |              |                                               |                                                                                                                      |                |                                                | Physical exercise              |                                  |                    |                                         |                                                              |
|                    |              |                                               |                                                                                                                      |                |                                                | Often                          | 1.0                              |                    |                                         |                                                              |
|                    |              |                                               |                                                                                                                      |                |                                                | Seldom                         | 0.9 (0.17–1.89)                  |                    |                                         |                                                              |
|                    |              |                                               |                                                                                                                      |                |                                                | Rectum                         |                                  |                    |                                         |                                                              |
|                    |              |                                               |                                                                                                                      |                |                                                | Occupational physical activity |                                  |                    |                                         |                                                              |
| Inoue et al. (19)  | 1988–92      | Hospital based (Aichi Cancer Center Hospital) | Cases: histologically confirmed cases; controls: first-visit outpatients free from cancer                            | Proximal colon | 176 (M: 103, F: 73)<br><br>176 (M: 103, F: 73) | Very active                    | 1.0                              |                    | Adjusted for age                        | *Common controls for cases of cancer of the colon and rectum |
|                    |              |                                               |                                                                                                                      |                |                                                | Sedentary                      | 1.9 (0.66–5.54)                  |                    |                                         |                                                              |
|                    |              |                                               |                                                                                                                      |                |                                                | Physical exercise              |                                  |                    |                                         |                                                              |
|                    |              |                                               |                                                                                                                      |                |                                                | Often                          | 1.0                              |                    |                                         |                                                              |
|                    |              |                                               |                                                                                                                      |                |                                                | Seldom                         | 1.0 (0.25–8.01)                  |                    |                                         |                                                              |
|                    |              |                                               |                                                                                                                      | Distal colon   | 51 men<br><br>43 women                         | Physical exercise              |                                  |                    |                                         |                                                              |
|                    |              |                                               |                                                                                                                      |                |                                                | ≤4/month                       | 1.0                              |                    |                                         |                                                              |
|                    |              |                                               |                                                                                                                      |                |                                                | >4/month                       | 0.7 (0.4–1.5)                    |                    |                                         |                                                              |
|                    |              |                                               |                                                                                                                      |                |                                                | ≤4/month                       | 1.0                              |                    |                                         |                                                              |
|                    |              |                                               |                                                                                                                      |                |                                                | >4/month                       | 0.5 (0.2–1.5)                    |                    |                                         |                                                              |
|                    |              |                                               |                                                                                                                      |                |                                                | ≤4/month                       | 1.0                              |                    |                                         |                                                              |
|                    |              |                                               |                                                                                                                      |                |                                                | >4/month                       | 0.7 (0.4–1.3)                    |                    |                                         |                                                              |
|                    |              |                                               |                                                                                                                      | Rectum         | 62 women<br><br>131 men                        | ≤4/month                       | 1.0                              |                    |                                         |                                                              |
|                    |              |                                               |                                                                                                                      |                |                                                | >4/month                       | 0.7 (0.4–1.3)                    |                    |                                         |                                                              |
|                    |              |                                               |                                                                                                                      |                |                                                | ≤4/month                       | 1.0                              |                    |                                         |                                                              |
|                    |              |                                               |                                                                                                                      |                |                                                | >4/month                       | 1.0 (0.5–2.0)                    |                    |                                         |                                                              |
|                    |              |                                               |                                                                                                                      |                |                                                | ≤4/month                       | 1.0                              |                    |                                         |                                                              |
|                    |              |                                               |                                                                                                                      |                |                                                | >4/month                       | 0.8 (0.5–1.3)                    |                    |                                         |                                                              |
|                    |              |                                               |                                                                                                                      | 70 women       | 23 161 women*                                  | ≤4/month                       | 1.0                              |                    |                                         |                                                              |
|                    |              |                                               |                                                                                                                      |                |                                                | >4/month                       | 0.7 (0.3–1.4)                    |                    |                                         |                                                              |

|                     |         |                                                                            |                                                                                                                                                              |                |                    |           |                               |                  |                                                                                                                                                                                                                                                                                                                                       |                                                     |
|---------------------|---------|----------------------------------------------------------------------------|--------------------------------------------------------------------------------------------------------------------------------------------------------------|----------------|--------------------|-----------|-------------------------------|------------------|---------------------------------------------------------------------------------------------------------------------------------------------------------------------------------------------------------------------------------------------------------------------------------------------------------------------------------------|-----------------------------------------------------|
| Ping et al. (20)    | 1986–94 | Health checkup based (Tokai University Hospital: health checkup examinees) | Cases: histologically confirmed cases; controls: cancer-free examinees                                                                                       | Colorectum     | 100 (M: 77, F: 23) | 265 (NA)  | Exercise                      |                  | Matched (1:3) for sex, age ( $\pm 2$ years), data of health checking ( $\pm 3$ months) and residence; 35 controls were excluded due to a lack of lifestyle data                                                                                                                                                                       | The definition of 'lack of exercise' is not stated. |
|                     |         |                                                                            |                                                                                                                                                              |                |                    |           | Not lacking                   | 1.00             |                                                                                                                                                                                                                                                                                                                                       |                                                     |
|                     |         |                                                                            |                                                                                                                                                              |                |                    |           | Lacking                       | 1.39 (0.87–2.20) |                                                                                                                                                                                                                                                                                                                                       |                                                     |
| Isomura et al. (21) | 2000–03 | Hospital based (two university hospitals and six affiliated hospitals)     | Cases: patients undergoing surgery for a first diagnosis of colorectal cancer; controls: population controls selected using two-stage random sampling method | Colon          |                    |           | Job-related physical activity |                  | The number of control candidates by sex and 10-year age class were determined a priori in accordance with sex and age-specific numbers of incident cases of colorectal cancer in the Osaka Cancer Registry; Adjusted for age, smoking, alcohol use, residence, BMI and non-job physical activities or job-related physical activities |                                                     |
|                     |         |                                                                            |                                                                                                                                                              |                | 248 men            | 470 men   | Sedentary                     | 1.0              |                                                                                                                                                                                                                                                                                                                                       |                                                     |
|                     |         |                                                                            |                                                                                                                                                              |                |                    |           | Moderate                      | 0.9 (0.6–1.4)    |                                                                                                                                                                                                                                                                                                                                       |                                                     |
|                     |         |                                                                            |                                                                                                                                                              |                |                    |           | Hard                          | 0.7 (0.4–1.0)    | 0.06                                                                                                                                                                                                                                                                                                                                  |                                                     |
|                     |         |                                                                            |                                                                                                                                                              |                |                    |           | Non-job physical activity     |                  |                                                                                                                                                                                                                                                                                                                                       |                                                     |
|                     |         |                                                                            |                                                                                                                                                              |                |                    |           | 0                             | 1.0              |                                                                                                                                                                                                                                                                                                                                       |                                                     |
|                     |         |                                                                            |                                                                                                                                                              |                |                    |           | 0.1–15.9                      | 0.9 (0.6–1.4)    |                                                                                                                                                                                                                                                                                                                                       |                                                     |
|                     |         |                                                                            |                                                                                                                                                              |                |                    |           | 16.0+                         | 0.8 (0.5–1.2)    | 0.22                                                                                                                                                                                                                                                                                                                                  |                                                     |
|                     |         |                                                                            |                                                                                                                                                              |                | 190 women          | 297 women | Job-related physical activity |                  |                                                                                                                                                                                                                                                                                                                                       |                                                     |
|                     |         |                                                                            |                                                                                                                                                              |                |                    |           | Sedentary                     | 1.0              |                                                                                                                                                                                                                                                                                                                                       |                                                     |
|                     |         |                                                                            |                                                                                                                                                              |                |                    |           | Active                        | 0.7 (0.4–1.2)    | 0.18                                                                                                                                                                                                                                                                                                                                  |                                                     |
|                     |         |                                                                            |                                                                                                                                                              |                |                    |           | Non-job physical activity     |                  |                                                                                                                                                                                                                                                                                                                                       |                                                     |
|                     |         |                                                                            |                                                                                                                                                              |                |                    |           | 0                             | 1.0              |                                                                                                                                                                                                                                                                                                                                       |                                                     |
|                     |         |                                                                            |                                                                                                                                                              |                |                    |           | 0.1–15.9                      | 0.9 (0.5–1.5)    |                                                                                                                                                                                                                                                                                                                                       |                                                     |
|                     |         |                                                                            |                                                                                                                                                              |                |                    |           | 16.0+                         | 0.8 (0.5–1.4)    | 0.45                                                                                                                                                                                                                                                                                                                                  |                                                     |
|                     |         |                                                                            |                                                                                                                                                              | Proximal colon |                    |           | Job-related physical activity |                  |                                                                                                                                                                                                                                                                                                                                       |                                                     |
|                     |         |                                                                            |                                                                                                                                                              |                | 88 men             | 470 men   | Sedentary                     | 1.0              |                                                                                                                                                                                                                                                                                                                                       |                                                     |
|                     |         |                                                                            |                                                                                                                                                              |                |                    |           | Moderate                      | 1.2 (0.6–2.2)    |                                                                                                                                                                                                                                                                                                                                       |                                                     |
|                     |         |                                                                            |                                                                                                                                                              |                |                    |           | Hard                          | 0.7 (0.4–1.4)    | 0.45                                                                                                                                                                                                                                                                                                                                  |                                                     |
|                     |         |                                                                            |                                                                                                                                                              |                |                    |           | Non-job physical activity     |                  |                                                                                                                                                                                                                                                                                                                                       |                                                     |
|                     |         |                                                                            |                                                                                                                                                              |                |                    |           | 0                             | 1.0              |                                                                                                                                                                                                                                                                                                                                       |                                                     |
|                     |         |                                                                            |                                                                                                                                                              |                |                    |           | 0.1–15.9                      | 1.2 (0.6–2.1)    |                                                                                                                                                                                                                                                                                                                                       |                                                     |
|                     |         |                                                                            |                                                                                                                                                              |                |                    |           | 16.0+                         | 0.9 (0.5–1.7)    | 0.69                                                                                                                                                                                                                                                                                                                                  |                                                     |

Continued



**Table 2.** *Continued*

| Reference | Study period | Study subjects  |            |              |                 | Category                      | Odds ratio (95% CI or <i>P</i> ) | <i>P</i> for trend | Confounding variables considered | Comments |
|-----------|--------------|-----------------|------------|--------------|-----------------|-------------------------------|----------------------------------|--------------------|----------------------------------|----------|
|           |              | Type and source | Definition | No. of cases | No. of controls |                               |                                  |                    |                                  |          |
|           |              |                 |            | 87 women     | 297 women       | Job-related physical activity |                                  |                    |                                  |          |
|           |              |                 |            |              |                 | Sedentary                     | 1.0                              |                    |                                  |          |
|           |              |                 |            |              |                 | Active                        | 1.2 (0.6–2.3)                    | 0.65               |                                  |          |
|           |              |                 |            |              |                 | Non-job physical activity     |                                  |                    |                                  |          |
|           |              |                 |            |              |                 | 0                             | 1.0                              |                    |                                  |          |
|           |              |                 |            |              |                 | 0.1–15.9                      | 1.5 (0.7–3.3)                    |                    |                                  |          |
|           |              |                 |            |              |                 | 16.0+                         | 1.6 (0.7–3.6)                    | 0.41               |                                  |          |
|           |              | Distal colon    |            |              |                 | Job-related physical activity |                                  |                    |                                  |          |
|           |              |                 |            | 159 men      | 470 men         | Sedentary                     | 1.0                              |                    |                                  |          |
|           |              |                 |            |              |                 | Moderate                      | 0.8 (0.4–1.4)                    |                    |                                  |          |
|           |              |                 |            |              |                 | Hard                          | 0.6 (0.4–1.0)                    | 0.047              |                                  |          |
|           |              |                 |            |              |                 | Non-job physical activity     |                                  |                    |                                  |          |
|           |              |                 |            |              |                 | 0                             | 1.0                              |                    |                                  |          |
|           |              |                 |            |              |                 | 0.1–15.9                      | 0.8 (0.5–1.3)                    |                    |                                  |          |
|           |              |                 |            |              |                 | 16.0+                         | 0.7 (0.4–1.1)                    | 0.19               |                                  |          |
|           |              | 103 women       |            | 297 women    |                 | Job-related physical activity |                                  |                    |                                  |          |
|           |              |                 |            |              |                 | Sedentary                     | 1.0                              |                    |                                  |          |
|           |              |                 |            |              |                 | Active                        | 0.4 (0.2–0.8)                    | 0.02               |                                  |          |
|           |              |                 |            |              |                 | Non-job physical activity     |                                  |                    |                                  |          |
|           |              |                 |            |              |                 | 0                             | 1.0                              |                    |                                  |          |
|           |              |                 |            |              |                 | 0.1–15.9                      | 0.7 (0.4–1.3)                    |                    |                                  |          |
|           |              |                 |            |              |                 | 16.0+                         | 0.6 (0.3–1.1)                    | 0.12               |                                  |          |
|           |              | Rectum          |            |              |                 | Job-related physical activity |                                  |                    |                                  |          |
|           |              |                 |            | 208 men      | 470 men         | Sedentary                     | 1.0                              |                    |                                  |          |
|           |              |                 |            |              |                 | Moderate                      | 0.9 (0.5–1.4)                    |                    |                                  |          |
|           |              |                 |            |              |                 | Hard                          | 0.6 (0.4–0.9)                    | 0.02               |                                  |          |
|           |              |                 |            |              |                 | Non-job physical activity     |                                  |                    |                                  |          |
|           |              |                 |            |              |                 | 0                             | 1.0                              |                    |                                  |          |
|           |              |                 |            |              |                 | 0.1–15.9                      | 0.6 (0.4–0.9)                    |                    |                                  |          |
|           |              |                 |            |              |                 | 16.0+                         | 0.5 (0.3–0.8)                    | 0.01               |                                  |          |

|  | 132 women | 297 women | Job-related physical activity |               |
|--|-----------|-----------|-------------------------------|---------------|
|  |           |           | Sedentary                     | 1.0           |
|  |           |           | Active                        | 1.1 (0.6–1.9) |
|  |           |           | Non-job physical activity     | 0.81          |
|  |           |           | 0                             | 1.0           |
|  |           |           | 0.1–15.9                      | 1.2 (0.7–2.3) |
|  |           |           | 16.0+                         | 0.9 (0.5–1.8) |
|  |           |           |                               | 0.47          |

NA, not available; NS, not significant; M, men; F, women.

prevention of obesity, a strong predictor of colorectal cancer, decreased inflammation, reduced levels of insulin and insulin-like growth factor 1 and modulated immune response (7,24,25). In addition, physical activity has been associated with an increased level of circulating vitamin D (26), which has an anti-carcinogenic effect on colonic epithelial cells (27) and has been related to lower risk of colon cancer (28). Other possible mechanisms include decreased bowel transit time (29), thereby resulting in less exposure of the colon to colonic contents, bile acids and other potential carcinogens. Physical activity was also related to increased prostaglandin F<sub>2</sub>α (30) and reduced prostaglandin E<sub>2</sub> (31); the former prevents tumor development in the colon and increases gut motility (32,33), whereas the latter reduces colonic motility and promotes the proliferation of colonic cells (32,34). Moreover, physical activity has been shown to be associated with decreased prevalence of colon adenoma (35), a precursor of colorectal cancer.

The association between physical activity and colorectal cancer in Japanese studies reviewed here is generally in agreement with that of previous reviews (6–10). A consistent dose–response relationship of physical activity to a decreased risk of colon cancer was observed in both cohort and case–control studies. Moreover, agreement exists between Japanese cohort studies (14,15) and previous reviews (6–9) on the lack of association between physical activity and risk of rectal cancer. Results of the present review support a protective role of physical activity in the prevention of colon cancer.

Unlike the protective association of physical activity with colon cancer risk consistently observed here and in previous reviews (6–10), the association with rectal cancer was mixed in our review. Consistent with previous reports (6–9), cohort studies reviewed here did not show any association between physical activity and rectal cancer, while the majority of case–control studies reported weak to moderate protective association (16–18,21) and some of the case–control studies exhibited a dose–response relationship (16,17,21). The possible disagreement regarding the association of physical activity with rectal cancer observed in cohort and case–control studies in the present review may be attributed to the difference of study design, as discussed in the methodological section above.

A point of note in the present review is that men showed a stronger protective association of physical activity with colon cancer than women in cohort studies. This observation is in line with numerous studies in other countries on this topic (6–10). We had no clear reason for such sex difference in association. One possible explanation is that men and women differ in terms of the amount, intensity and duration of physical activity engaged. It is conceivable that men tend to be engaged in more strenuous physical activity when compared with women. In addition, women are more likely to participate in housework and childcare, which are difficult to assess precisely. As a result, men may provide more accurate information about their physical activity than women. Epidemiologic evidence suggests that 30–60 min per day of moderate to vigorous intensity physical activity are necessary to reduce colon cancer risk (36).

**Table 3.** Summary of the association between physical activity and colorectal cancer risk, cohort study

| References            | Study period | Study population |                    |                    |           |                                    | Magnitude of association <sup>a</sup> |        |            |
|-----------------------|--------------|------------------|--------------------|--------------------|-----------|------------------------------------|---------------------------------------|--------|------------|
|                       |              | Sex              | Number of subjects | Ranged age (years) | Event     | Number of incident cases or deaths | Colon                                 | Rectum | Colorectum |
| Lee et al. (14)       | 1995–02      | Men              | 29 842             | 40–69              | Incidence | 290                                | ↓↓↓ <sup>b,c,d</sup>                  | —      | ↓          |
|                       |              | Women            | 35 180             | 40–69              | Incidence | 196                                | ↓ <sup>b</sup>                        | ↑↑     | —          |
| Takahashi et al. (15) | 1990–97      | Men              | 25 279             | 40–64              | Incidence | 166                                | ↓↓↓ <sup>d</sup>                      | —      | ↓↓         |
|                       |              | Women            | 26 642             | 40–64              | Incidence | 94                                 | —                                     | —      | —          |

<sup>a</sup>↑↑↑ or ↓↓↓, strong; ↑↑ or ↓↓, moderate; ↑ or ↓, weak; —, no association (see text for more detailed definition); if the magnitude of association differs between occupational and non-occupational activities or between proximal and distal colon, strongest association is reported.  
<sup>b</sup>Proximal colon.  
<sup>c</sup>Occupational physical activity.  
<sup>d</sup>Non-occupational physical activity.

**Table 4.** Summary of the association between physical activity and colorectal cancer risk, case–control study

| Reference           | Study period | Study subjects |               |              |        |            |                 | Magnitude of association <sup>a</sup> |                   |            |
|---------------------|--------------|----------------|---------------|--------------|--------|------------|-----------------|---------------------------------------|-------------------|------------|
|                     |              | Sex            | Age range     | No. of cases |        |            | No. of controls | Colon                                 | Rectum            | Colorectum |
|                     |              |                |               | Colon        | Rectum | Colorectum |                 |                                       |                   |            |
| Kato et al. (16)    | 1979–87      | Men            | ≥20 year      | 1716         | 1611   | NP         | 16 600          | ↓↓ <sup>d</sup>                       | ↓ <sup>d</sup>    | NA         |
| Kato et al. (17)    | 1986–90      | Men and women  | Not specified | 132          | 91     | NP         | 578             | ↓↓ <sup>d,e</sup>                     | ↓↓ <sup>d</sup>   | NA         |
| Kotake et al. (18)  | 1992–94      | Men and women  | Not specified | 187          | 176    | NP         | 363             | —                                     | ↓ <sup>d</sup>    | NA         |
| Inoue et al. (19)   | 1988–92      | Men            | 24–86 year    | 126          | 131    | NP         | 8621            | — <sup>c</sup>                        | — <sup>c</sup>    | NA         |
|                     |              | Women          | 24–88 year    | 105          | 70     | NP         | 23 161          | ↓ <sup>b,c</sup>                      | — <sup>c</sup>    | NA         |
| Ping et al. (20)    | 1986–94      | Men and women  | 40–84 year    | NP           | NP     | 100        | 265             | NA                                    | NA                | —          |
| Isomura et al. (21) | 2000–03      | Men            | 20–74 year    | 248          | 208    | NP         | 470             | ↓↓ <sup>c,d</sup>                     | ↓↓ <sup>d,e</sup> | NA         |
|                     |              | Women          | 20–74 year    | 190          | 132    | NP         | 297             | ↓↓↓ <sup>c,d</sup>                    | —                 | NA         |

NP, not provided; NA, not available; M, men; F, women.  
<sup>a</sup>↑↑↑ or ↓↓↓, strong; ↑↑ or ↓↓, moderate; ↑ or ↓, weak; —, no association (see text for more detailed definition); if the magnitude of association differs between occupational and non-occupational activities or between proximal and distal colon, strongest association is reported.  
<sup>b</sup>Proximal colon.  
<sup>c</sup>Distal colon.  
<sup>d</sup>Occupational physical activity.  
<sup>e</sup>Non-occupational physical activity.

In conclusion, epidemiological evidence for a protective association of physical activity with colorectal cancer among the Japanese population is more consistent and stronger for colon cancer than for rectal cancer. A protective association with rectal cancer was observed in some case–control studies, but not in cohort studies.

EVALUATION OF EVIDENCE ON PHYSICAL ACTIVITY AND COLORECTAL CANCER IN JAPANESE

From the results of the present review and based on the hypothesized biological plausibility, we conclude that physical activity probably reduces the risk of colorectal cancer

among the Japanese population. More specifically, the evidence for the colon is probable, whereas that for the rectum is insufficient.

Acknowledgements

The authors gratefully acknowledge the assistance of Ms Izumi Suenaga.

Funding

This study was supported by Third Term Comprehensive 10-year Strategy for Cancer Control from the Ministry of Health, Labour and Welfare, Japan.

## Conflict of interest statement

None declared.

## References

- Jemal A, Bray F, Center MM, Ferlay J, Ward E, Forman D. Global cancer statistics. *CA Cancer J Clin* 2011;61:69–90.
- Bosetti C, Malvezzi M, Chatenoud L, Negri E, Levi F, La Vecchia C. Trends in colorectal cancer mortality in Japan, 1970–2000. *Int J Cancer* 2005;113:339–41.
- International Agency for Research on Cancer. In: Curado MP, Edwards B, Shin B, et al., editors. *Cancer Incidence in Five Continents*. Vol. IX, IARC Scientific Publications No. 160. Geneva: World Health Organization 2007.
- Kono S. Secular trend of colon cancer incidence and mortality in relation to fat and meat intake in Japan. *Eur J Cancer Prev* 2004;13:127–32.
- Kuriki K, Tajima K. The increasing incidence of colorectal cancer and the preventive strategy in Japan. *Asian Pac J Cancer Prev* 2006;7:495–501.
- Samad AK, Taylor RS, Marshall T, Chapman MA. A meta-analysis of the association of physical activity with reduced risk of colorectal cancer. *Colorectal Dis* 2005;7:204–13.
- World Cancer Research Fund/American Institute for Cancer Research. *Food, Nutrition, Physical Activity, and the Prevention of Cancer: A Global Perspective*. Washington, DC: American Institute for Cancer Research 2007.
- Harriss DJ, Atkinson G, Batterham A, George K, Cable NT, Reilly T, et al. Lifestyle factors and colorectal cancer risk (2): a systematic review and meta-analysis of associations with leisure-time physical activity. *Colorectal Dis* 2009;11:689–701.
- Spence RR, Heesch KC, Brown WJ. A systematic review of the association between physical activity and colorectal cancer risk. *Scand J Med Sci Sports* 2009;19:764–81.
- Wolin KY, Yan Y, Colditz GA, Lee IM. Physical activity and colon cancer prevention: a meta-analysis. *Br J Cancer* 2009;100:611–6.
- Mizoue T, Inoue M, Tanaka K, Tsuji I, Wakai K, Nagata C, et al. Tobacco smoking and colorectal cancer risk: an evaluation based on a systematic review of epidemiologic evidence among the Japanese population. *Jpn J Clin Oncol* 2006;36:25–39.
- Mizoue T, Tanaka K, Tsuji I, Wakai K, Nagata C, Otani T, et al. Alcohol drinking and colorectal cancer risk: an evaluation based on a systematic review of epidemiologic evidence among the Japanese population. *Jpn J Clin Oncol* 2006;36:582–97.
- World Health Organization. WHO Technical Reports Series 916. Diet, Nutrition, the Prevention of Chronic Disease. Report of a Joint WHO/FAO Expert Consultation. Geneva: WHO 2003.
- Lee KJ, Inoue M, Otani T, Iwasaki M, Sasazuki S, Tsugane S; JPHC Study Group. Physical activity and risk of colorectal cancer in Japanese men and women: the Japan Public Health Center-based prospective Study. *Cancer Causes Control* 2007;18:199–209.
- Takahashi H, Kuriyama S, Tsubono Y, Nakaya N, Fujita K, Nishino Y, et al. Time spent walking and risk of colorectal cancer in Japan: the Miyagi Cohort study. *Eur J Cancer Prev* 2007;16:403–8.
- Kato I, Tominaga S, Ikari A. A case–control study of male colorectal cancer in Aichi Prefecture, Japan: with special reference to occupational activity level, drinking habits and family history. *Jpn J Cancer Res* 1990;81:115–21.
- Kato I, Tominaga S, Matsuura A, Yoshii Y, Shirai M, Kobayashi S. A comparative case–control study of colorectal cancer and adenoma. *Jpn J Cancer Res* 1990;81:1101–8.
- Kotake K, Koyama Y, Nasu J, Fukutomi T, Yamaguchi N. Relation of family history of cancer and environmental factors to the risk of colorectal cancer: a case–control study. *Jpn J Clin Oncol* 1995;25:195–202.
- Inoue M, Tajima K, Hirose K, Hamajima N, Takezaki T, Hirai T, et al. Subsite-specific risk factors for colorectal cancer: a hospital-based case–control study in Japan. *Cancer Causes Control* 1995;6:14–22.
- Ping Y, Ogushi Y, Okada Y, Haruki Y, Okazaki I, Ogawa T. Lifestyle and colorectal cancer: a case–control study. *Environ Health Prev Med* 1998;3:146–51.
- Isomura K, Kono S, Moore MA, Toyomura K, Nagano J, Mizoue T, et al. Physical activity and colorectal cancer: the Fukuoka Colorectal Cancer Study. *Cancer Sci* 2006;97:1099–104.
- Terry P, Giovannucci E, Michels KB, Bergkvist L, Hansen H, Holmberg L, et al. Fruit, vegetables, dietary fiber, and risk of colorectal cancer. *J Natl Cancer Inst* 2001;93:525–33.
- Du W, Li WY, Lu R, Fang JY. Folate and fiber in the prevention of colorectal cancer: between shadows and the light. *World J Gastroenterol* 2010;16:921–6.
- Harriss DJ, Cable NT, George K, Reilly T, Renehan AG, Haboubi N. Physical activity before and after diagnosis of colorectal cancer: disease risk, clinical outcomes, response pathways and biomarkers. *Sports Med* 2007;37:947–60.
- Rogers CJ, Colbert LH, Greiner JW, Perkins SN, Hursting SD. Physical activity and cancer prevention: pathways and targets for intervention. *Sports Med* 2008;38:271–96.
- Scragg R, Camargo CA, Jr. Frequency of leisure-time physical activity and serum 25-hydroxyvitamin D levels in the US population: results from the Third National Health and Nutrition Examination Survey. *Am J Epidemiol* 2008;168:577–86; discussion 587–91.
- Lamprecht SA, Lipkin M. Cellular mechanisms of calcium and vitamin D in the inhibition of colorectal carcinogenesis. *Ann N Y Acad Sci* 2001;952:73–87.
- Touvier M, Chan DS, Lau R, Aune D, Vieira R, Greenwood DC, et al. Meta-analyses of vitamin D intake, 25-hydroxyvitamin D status, vitamin D receptor polymorphisms, and colorectal cancer risk. *Cancer Epidemiol Biomarkers Prev* 2011;20:1003–16.
- Cordain L, Latin RW, Behnke JJ. The effects of an aerobic running program on bowel transit time. *J Sports Med Phys Fitness* 1986;26:101–4.
- Demers LM, Harrison TS, Halbert DR, Santen RJ. Effect of prolonged exercise on plasma prostaglandin levels. *Prostaglandin Med* 1981;6:413–8.
- Martínez ME, Heddens D, Earnest DL, Bogert CL, Roe D, Einspahr J, et al. Physical activity, body mass index, and prostaglandin E<sub>2</sub> levels in rectal mucosa. *J Natl Cancer Inst* 1999;91:950–3.
- Karmali RA. Review: prostaglandins and cancer. *Prostaglandins Med* 1980;5:11–28.
- Milton-Thompson GJ, Cummings JH, Newman A, Billings JA, Misiewicz JJ. Colonic and small intestinal response to intravenous prostaglandin F<sub>2α</sub> and E<sub>2</sub> in man. *Gut* 1975;16:42–6.
- Hunt RH, Dilawari JB, Misiewicz JJ. The effect of intravenous prostaglandin F<sub>2α</sub> and E<sub>2</sub> on the motility of the sigmoid colon. *Gut* 1975;16:47–9.
- Wolin KY, Yan Y, Colditz GA. Physical activity and risk of colon adenoma: a meta-analysis. *Br J Cancer* 2011;104:882–5.
- Lee IM. Physical activity and cancer prevention-data from epidemiologic studies. *Med Sci Sports Exerc* 2003;35:1823–7.

## Appendix

Research group members: Shoichiro Tsugane (principal investigator), Manami Inoue, Shizuka Sasazuki, Motoki Iwasaki, Tetsuya Otani (until 2006), Norie Sawada (since 2007), Taichi Shimazu (since 2007) (National Cancer Center, Tokyo); Ichiro Tsuji (since 2004), Yoshitaka Tsubono (in 2003) (Tohoku University, Sendai); Yoshikazu Nishino (until 2006) (Miyagi Cancer Research Institute, Natori, Miyagi); Akiko Tamakoshi (since 2010) (Aichi Medical University, Aichi); Keitaro Matsuo (until 2010), Hidemi Ito (since 2010) (Aichi Cancer Center, Nagoya); Kenji Wakai (Nagoya University, Nagoya); Chisato Nagata (Gifu University, Gifu); Tetsuya Mizoue (National Center for Global Health and Medicine, Tokyo); Keitaro Tanaka (Saga University, Saga).
